# Supplementary material for: Seco-Taondiol, an Unusual Meroterpenoid from the Chilean Seaweed Stypopodium flabelliforme and Its Gastroprotective Effect in Mouse Model
Source: PubMed Central journal article supplement (PMC4413184; doi:10.3390/md13041726), 2015-03-30
Supplement: marinedrugs-13-01726-s001.pdf [file marinedrugs-13-01726-s001.pdf]

## Supplementary Information

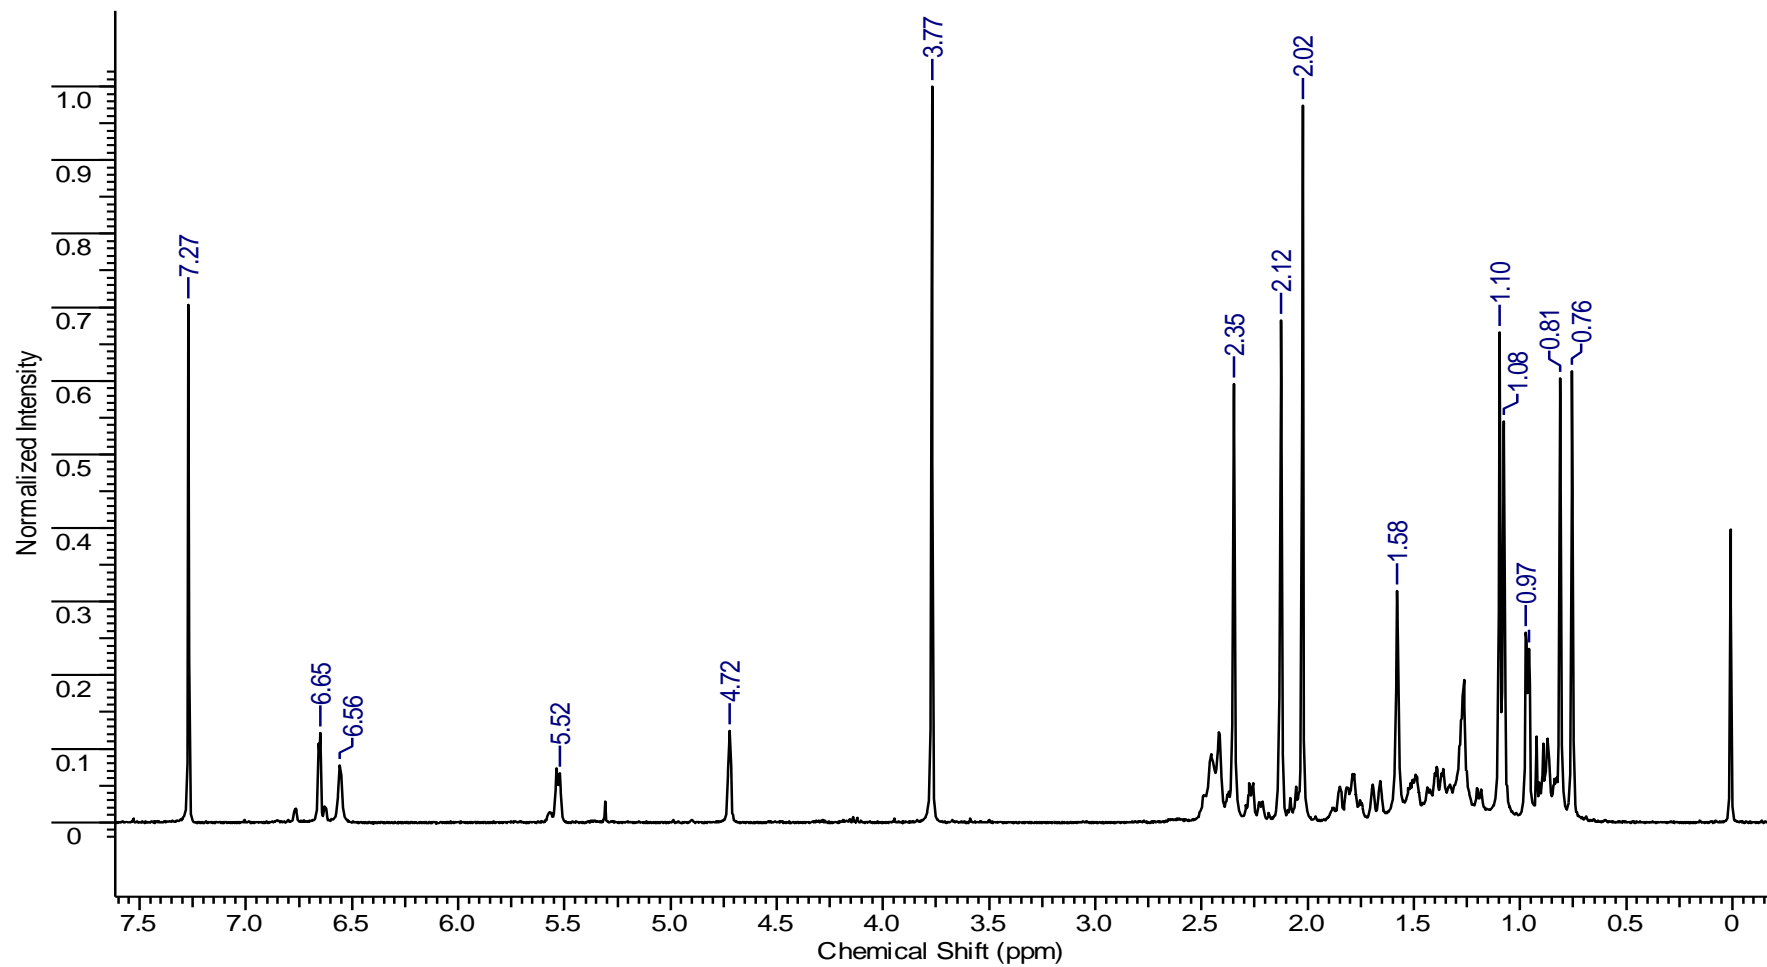

**Figure S1.** <sup>1</sup>H-NMR spectrum of compound **7** (CDCl<sub>3</sub>).

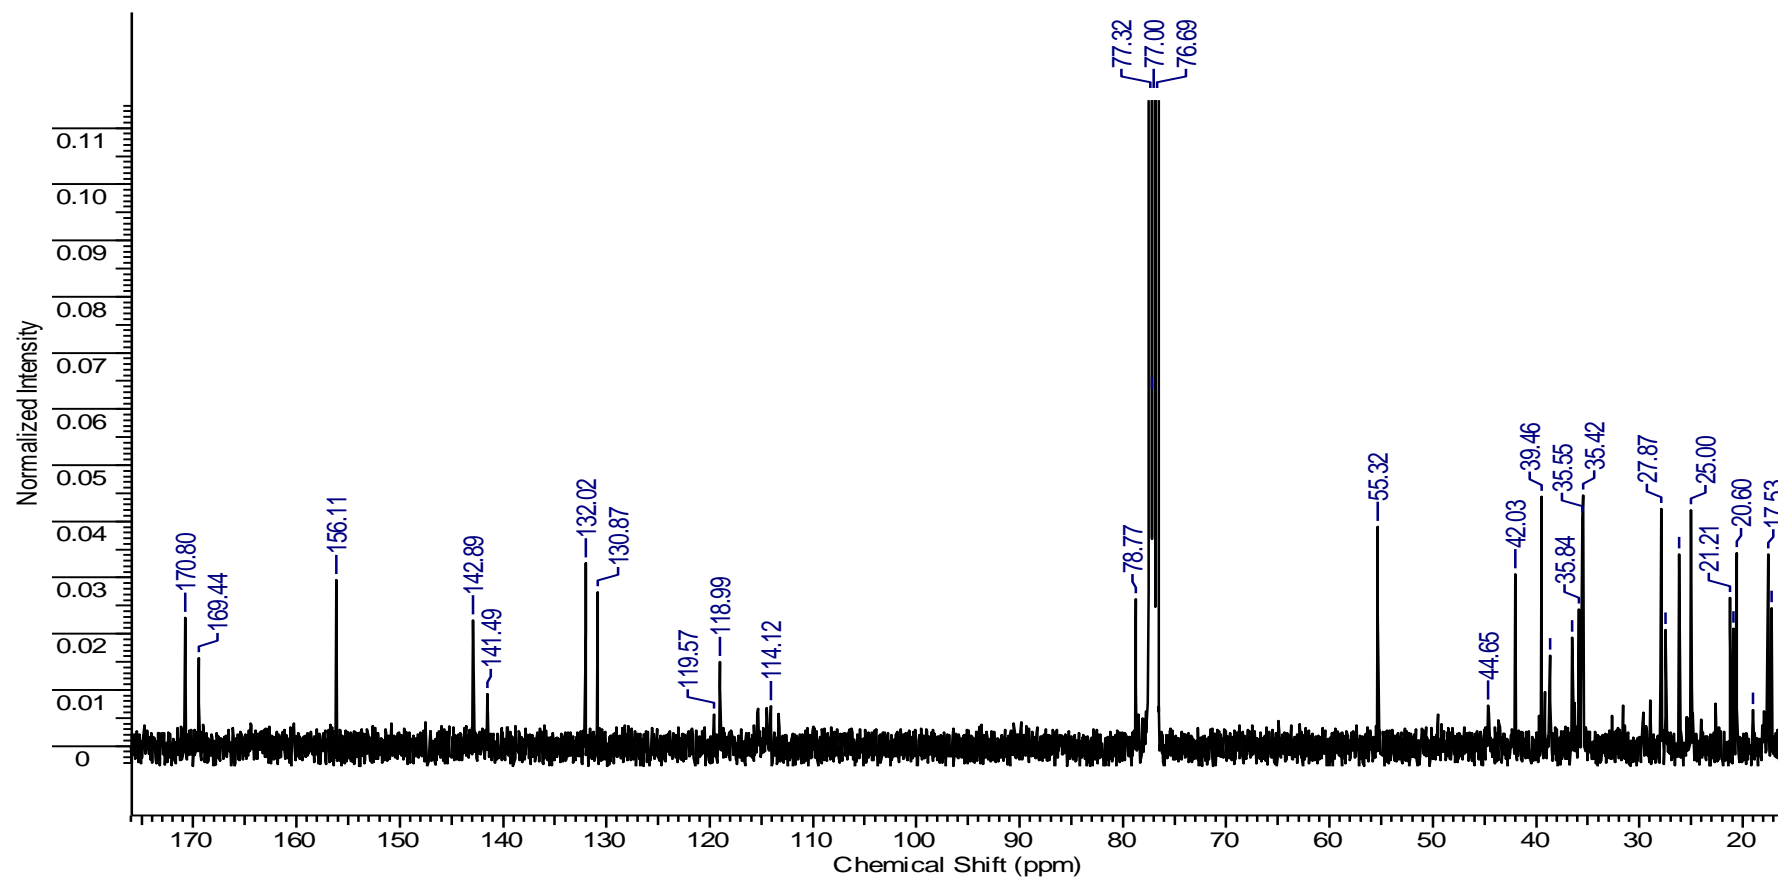

Figure S2.  $^{13}\text{C}$ -NMR spectrum of compound 7 ( $\text{CDCl}_3$ ).

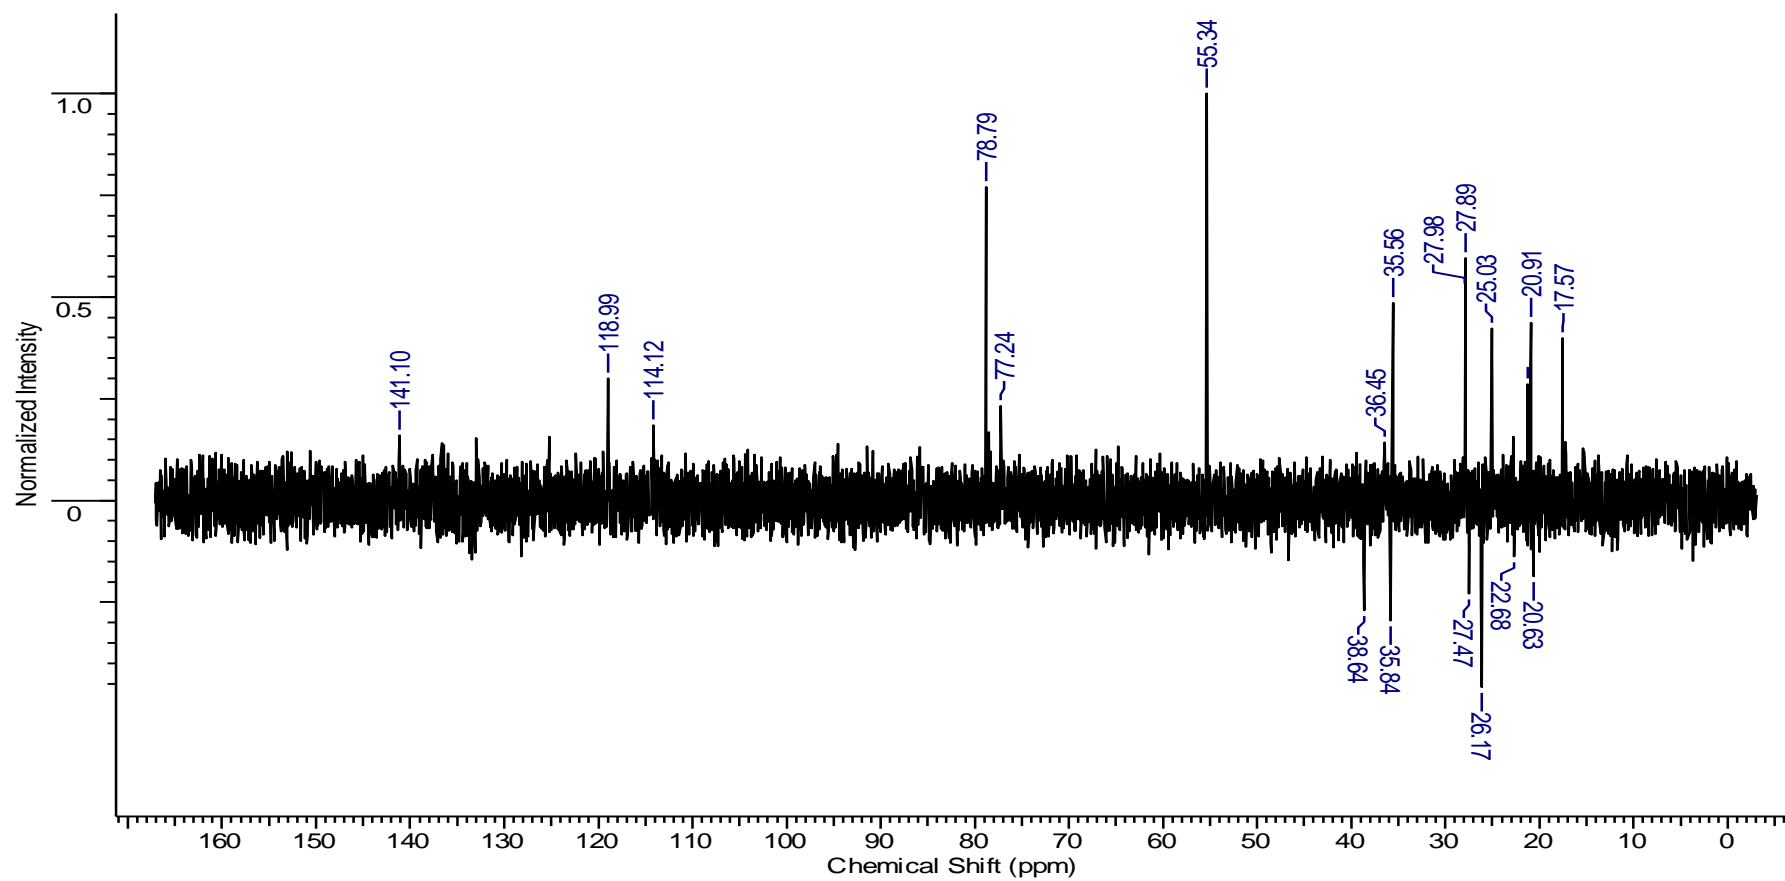

Figure S3. DEPT 135 spectrum of compound 7 (CDCl<sub>3</sub>).

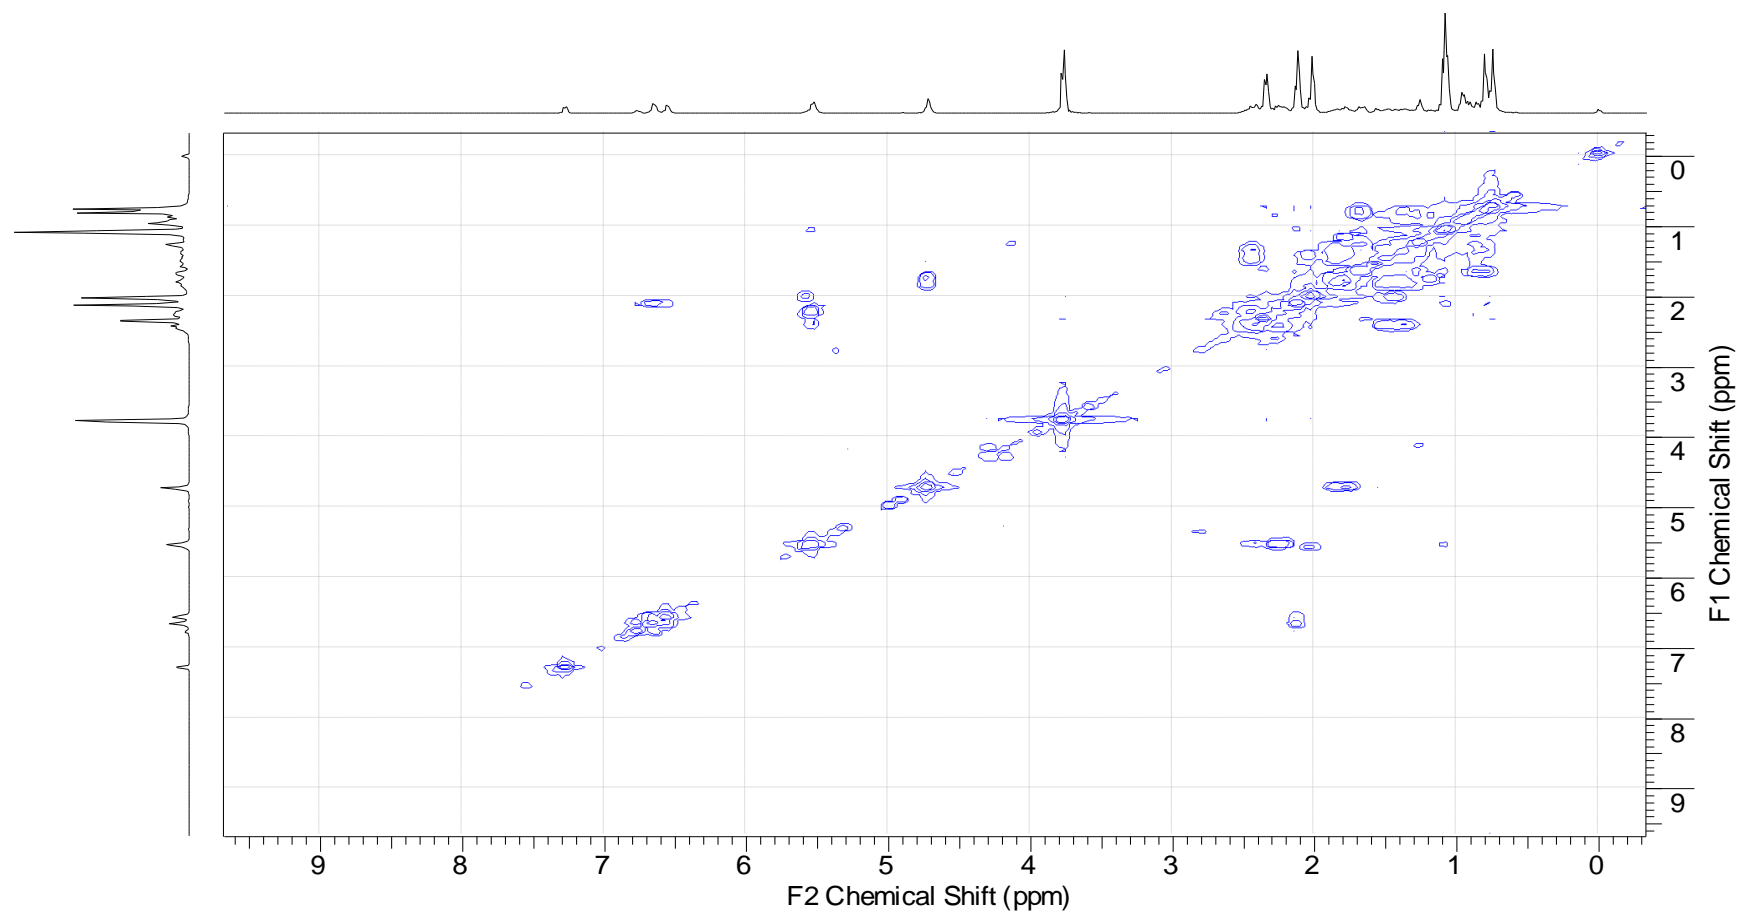

**Figure S4.** COSY spectrum of compound **7** (CDCl<sub>3</sub>).

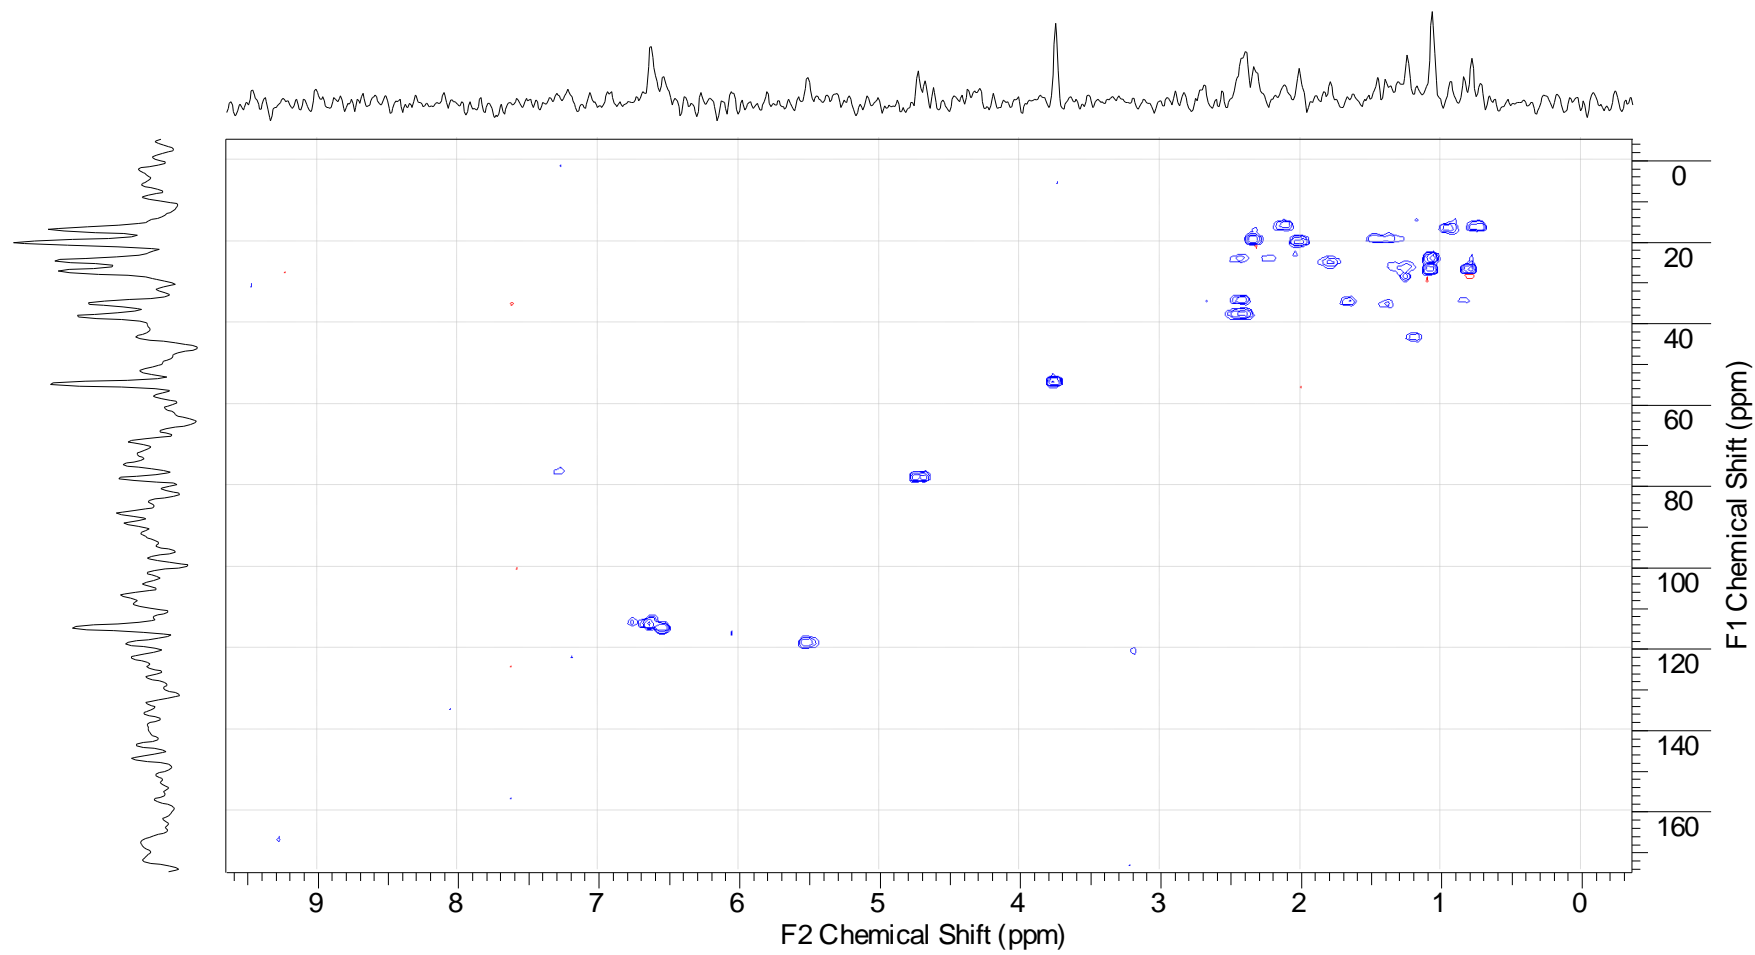

**Figure S5.** HMQC spectrum of compound **7** (CDCl<sub>3</sub>).

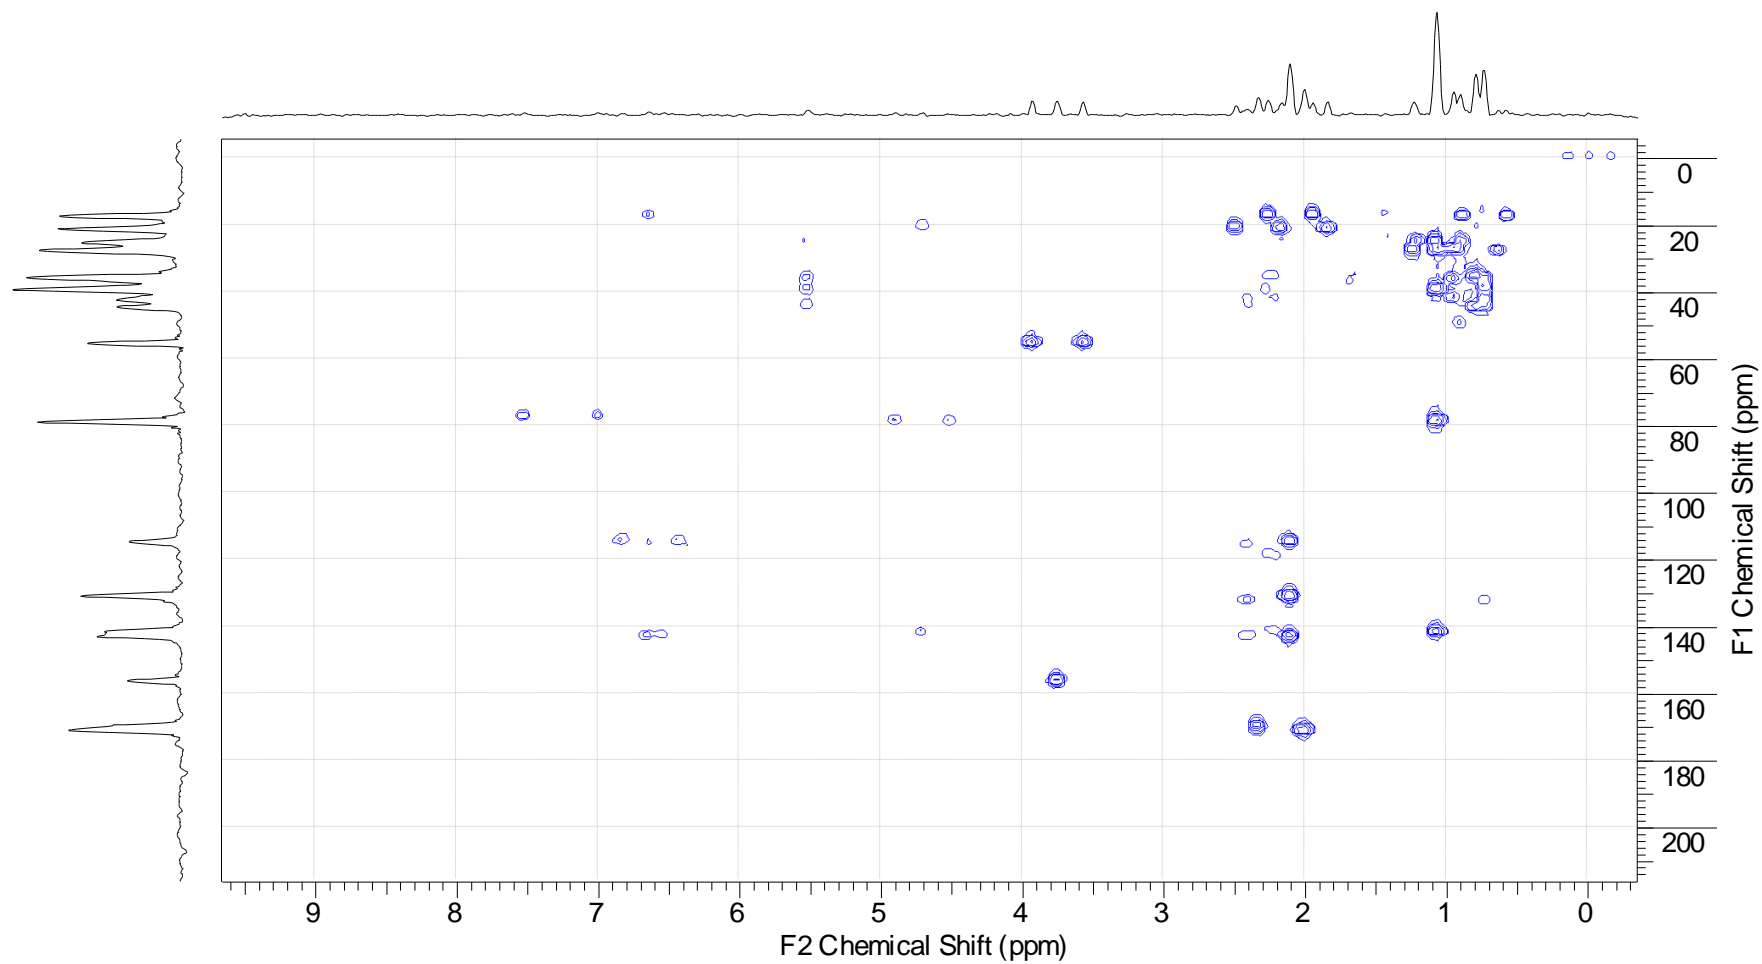

**Figure S6.** HMBC spectrum of compound 7 (CDCl<sub>3</sub>).

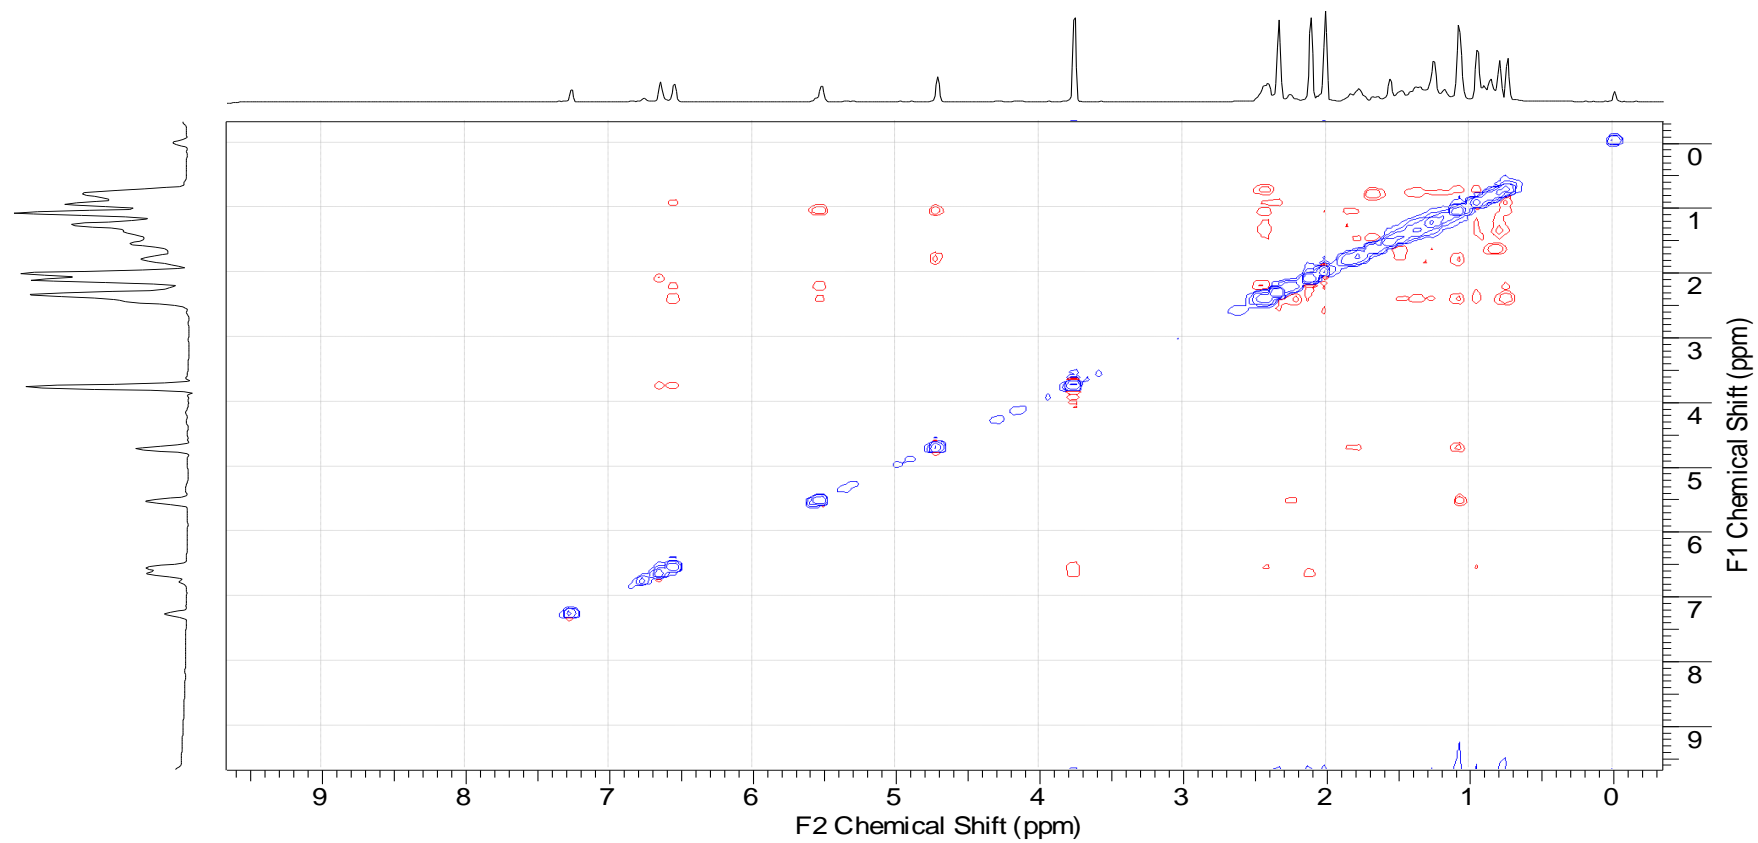

**Figure S7.** NOESY spectrum of compound **7** (CDCl<sub>3</sub>).

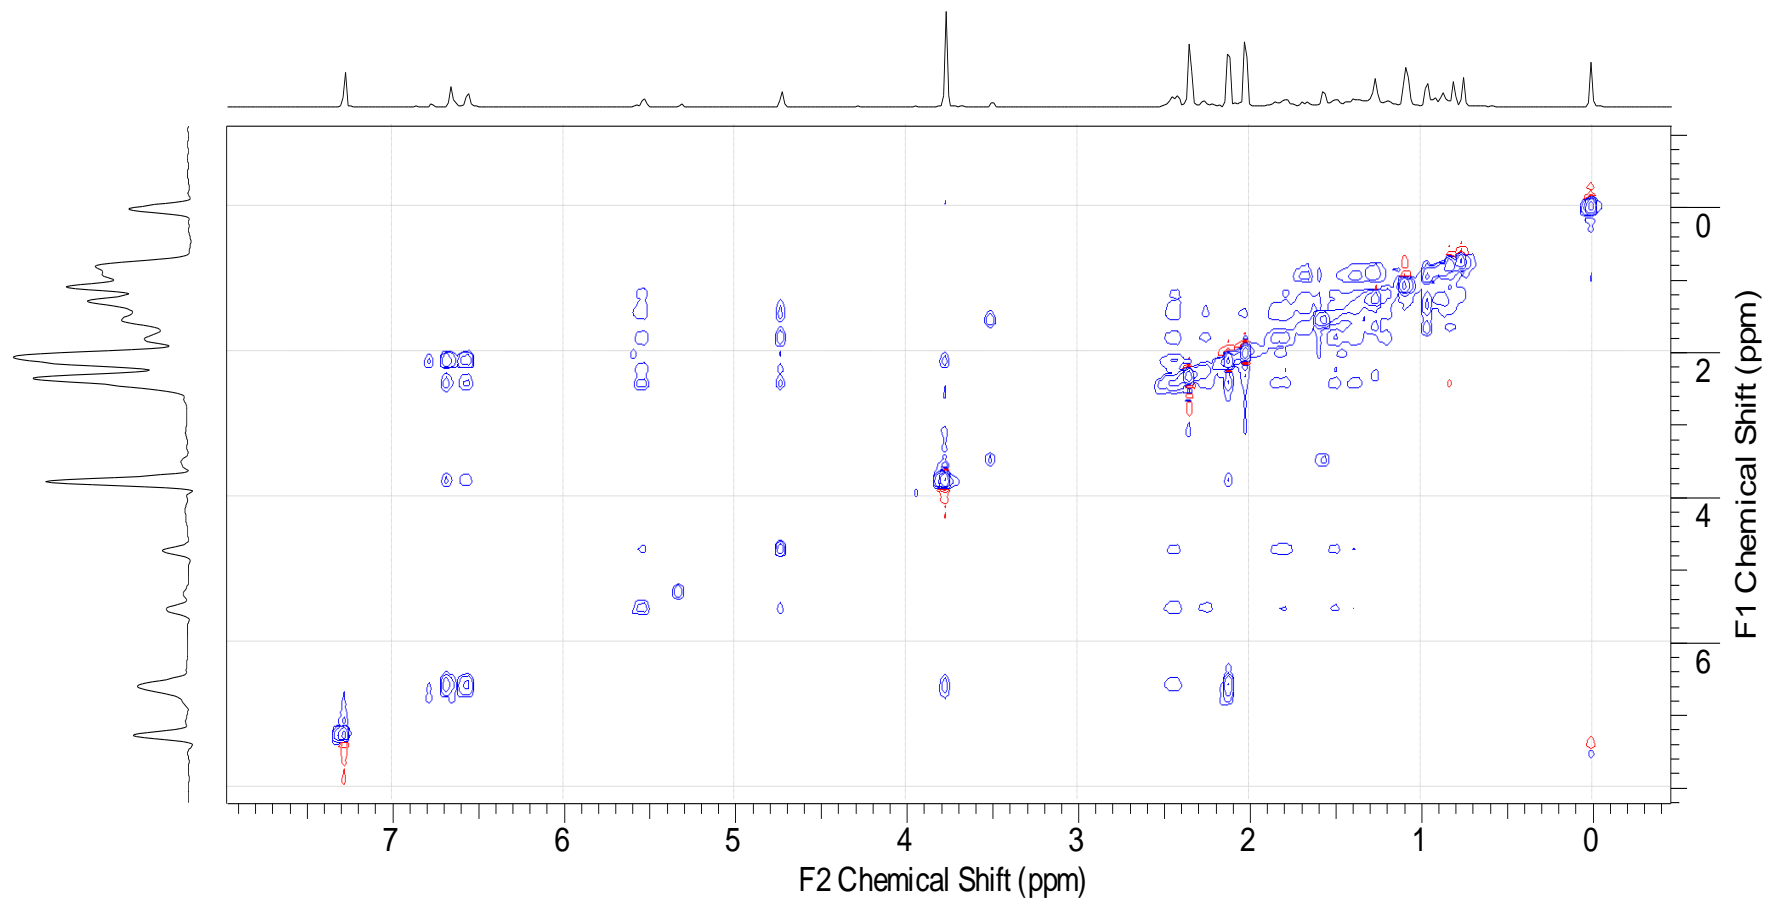

**Figure S8.** TOCSY spectrum of compound **7** (CDCl<sub>3</sub>).



*General Procedure of Hydrolysis*

To a stirred solution of meroterpenoid in MeOH (20 mL), K<sub>2</sub>CO<sub>3</sub> (catalytic amount) was added. The reaction mixture was stirred at room temperature under N<sub>2</sub> for 24 h, then rapidly concentrated under N<sub>2</sub> atmosphere. The resulting mixture was then diluted with H<sub>2</sub>O (20 mL) and filtered to yield a solid following solvent removed. The latter was re-dissolved in EtOAc for analysis.

© 2015 by the authors; licensee MDPI, Basel, Switzerland. This article is an open access article distributed under the terms and conditions of the Creative Commons Attribution license (<http://creativecommons.org/licenses/by/4.0/>).
